# Supplementary material for: A covalent organic framework for high-rate aqueous calcium-ion batteries
Source: Royal Society of Chemistry journal article supplement (doi:10.1039/d2ta05185k), 2022-01-01
Supplement: d2ta05185k1.pdf [file d2ta05185k1.pdf]

Supporting information for

# A Covalent Organic Framework for High-rate Aqueous Calcium-ion Batteries

Linyuan Li,<sup>a</sup> Guobin Zhang,<sup>a,\*</sup> Xianming Deng,<sup>a</sup> Jing Hao,<sup>a</sup> Xu Zhao,<sup>a</sup> Hongfei Li,<sup>b</sup> Cuiping Han,<sup>c,d,\*</sup>  
and Baohua Li<sup>a,\*</sup>

<sup>a</sup>Shenzhen Key Laboratory on Power Battery Safety and Shenzhen Geim Graphene Center, Tsinghua Shenzhen International Graduate School, Tsinghua University, Shenzhen 518055, China. Email: libh@mail.sz.tsinghua.edu.cn (B. Li)

<sup>b</sup>School of System Design and Intelligent Manufacturing, Southern University of Science and Technology, Shenzhen, Guangdong, 518055, China.

<sup>c</sup>Faculty of Materials Science and Engineering/ Low Dimensional Energy Materials Research Center, Shenzhen Institutes of Advanced Technology, Chinese Academy of Sciences, 518060, Shenzhen, China. Email: cp.han@siat.ac.cn (C. Han)

<sup>d</sup>College of Materials Science and Engineering, Shenzhen Key Laboratory of Special Functional Materials, Shenzhen University, Shenzhen, 518060, China.

## Calculation of theoretical specific capacity

Theoretical capacity can be calculated by the following equation<sup>1</sup>.

$$Q = \frac{nF}{3.6M_w} \dots (\text{Equation S1})$$

Where  $Q$  (mAh g<sup>-1</sup>) is theoretical capacity,  $F$  (C mol<sup>-1</sup>) is Faraday constant,  $n$  is the electron transfer number per unit, and  $M_w$  is the corresponding molecular weight (g mol<sup>-1</sup>).

For each unit, there were 6/3=2Tp (with three C=O groups) and 6/2=3Hq (with two C=O groups). For the convenience of calculation, it is considered that C-OH were all converted to C=O.  $M_w=3 \times 159 + 2 \times 136 = 726$  g mol<sup>-1</sup>, During the reaction, one C=O group corresponded to the transfer of one electron, then  $n=3 \times 2 + 2 \times 3 = 12$ .

$$Q = \frac{12 \times 96485}{3.6 \times 726} = 442 \text{ mAh g}^{-1}$$

## Calculation based on Nernst Equation

According to a previously reported method<sup>2</sup>, the electrochemical reaction of HqTp with H<sup>+</sup> in 1M HCl can be expressed as below:

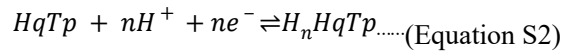

Nernst Equation :

$$\varphi = \varphi^\theta + \frac{2.303RT}{nF} \log \frac{[HqTp][H^+]^n}{[H_nHqTp]} = \varphi^\theta + \frac{0.0592}{n} \log \frac{[HqTp][H^+]^n}{[H_nHqTp]} \dots (\text{Equation S3})$$

Where  $\varphi$  is electrode potential;  $\varphi^\theta$  is the standard potential;  $R$  is the universal gas constant (8.314 J K<sup>-1</sup> mol<sup>-1</sup>);  $T$  is the temperature 298.15 K;  $n$  is the electron transfer numbers;  $F$  is the Faraday constant (96500 C mol<sup>-1</sup>). We consider the activity of HqTp and H<sub>n</sub>HqTp as 1, then simplified the equation:

$$\varphi = \varphi^\theta + \frac{0.0592}{n} \log [H^+]^n = \varphi^\theta + \frac{0.0592}{n} \log [H^+] \dots (\text{Equation S4})$$

For 1M HCl aqueous solution (pH=1) and 1 M CaCl<sub>2</sub> aqueous solution (pH≈7.8),  $\Delta\varphi$  can be calculated as:

$$\Delta\varphi = 0.0592 \log \frac{[H^+]_{HCl}}{[H^+]_{CaCl_2}} = 0.0592 \log \frac{1}{10^{-7.8}} = 0.462 \text{ V}$$

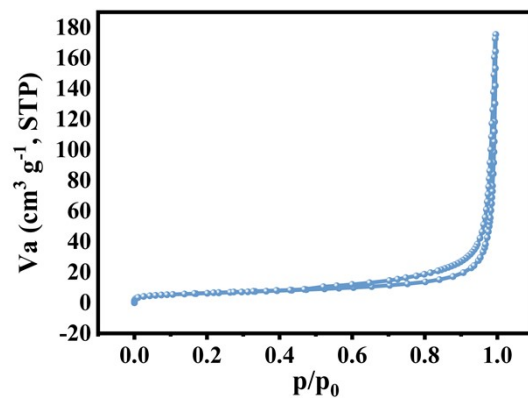

Figure S1. N<sub>2</sub> gas adsorption analysis of HqTp, the area of the HqTp is 22.9 m<sup>2</sup> g<sup>-1</sup>.

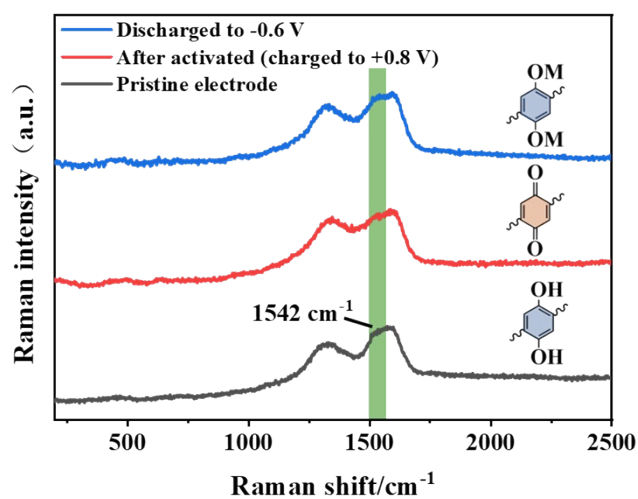

Figure S2. The Raman spectra of the electrodes in different states (M= proton / calcium).

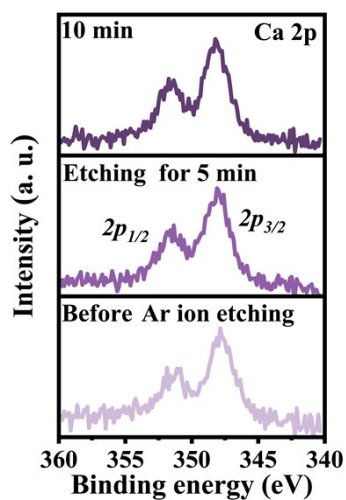

Figure S3. The XPS Ca 2p spectra of the HqTp electrode discharged to -0.6 V after different etching

time.

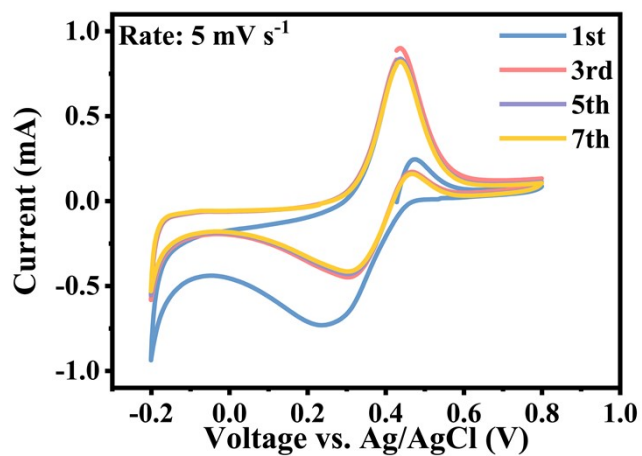

Figure S4. The CV curves in in HCl aqueous solution (pH=1) for 7 cycles.

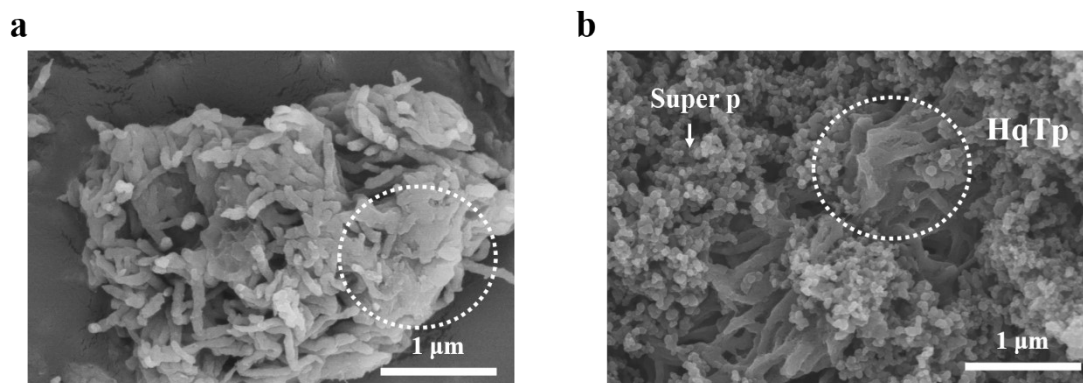

Figure S5. The SEM images of the (a) HqTp-COF powder and (b) the electrode discharged to -0.6 V.

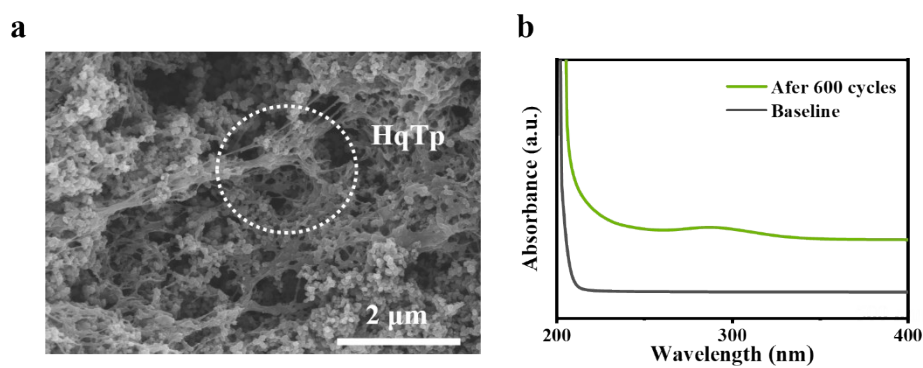

Figure S6. After 600 cycles, (a) the SEM image of the electrode and (b) the UV-vis spectra of the 1 M  $\text{CaCl}_2$  electrolyte.

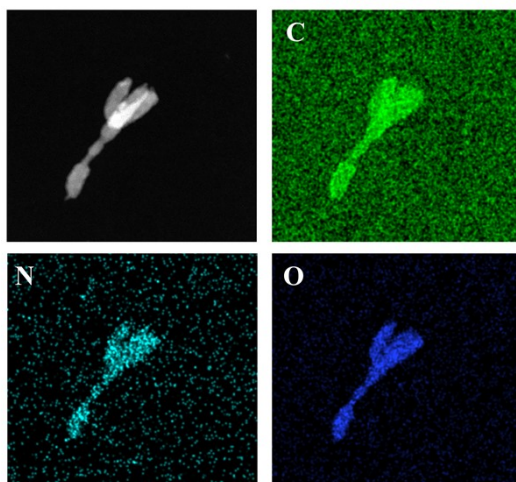

Figure S7. TEM images of the pristine HqTp and the EDS mapping.

1. M. Winter and R. J. Brodd, *Chemical Reviews*, 2004, **104**, 4245-4270.
2. Y. Wang, C. Wang, Z. Ni, Y. Gu, B. Wang, Z. Guo, Z. Wang, D. Bin, J. Ma and Y. Wang, *Advanced Materials*, 2020, **32**, 2000338.
